# Supplementary material for: The nuclear lamina couples mechanical forces to cell fate in the preimplantation embryo via actin organization
Source: PubMed Central journal article supplement (PMC10226985; doi:10.1038/s41467-023-38770-5), 2023-05-29
Supplement: 41467_2023_38770_MOESM3_ESM.pdf [file 41467_2023_38770_MOESM3_ESM.pdf]

## **Description of Additional Supplementary Files**

File Name: Supplementary Movie 1

Description: Embryos expressing Utrophin-GFP are shown at the 4-cell and 8-cell stages. Expression of Utrophin-GFP, 3D segmentation and quantification of local curvature. Divisions at the 4-cell stage produce higher deformation of cell shape.
